---

## Correction

*Hot and sweet: protein glycosylation in Crenarchaeota*

Benjamin H. Meyer and Sonja-Verena Albers

Volume 41 Part 1 (2013) 384–392

In the first sentence of the second paragraph of the ‘Effect of the phenotype by the *agl* deletion mutant’ section on p. 389, the published reference citations were incorrect in the print journal. The correct citations appear here. The online journal is not affected.

Under standard growth conditions, no significant changes in the growth rates of the *agl* mutants compared with the background strain MW001 were observed ([16], and B.H. Meyer, E. Peyfoon, P.G. Hitchen, A. Dell and S.-V. Albers, unpublished work).
